# Supplementary material for: Using word embeddings to expand terminology of dietary supplements on clinical notes
Source: PubMed Central journal article supplement — JAMIA Open. 2019 Mar 28;2(2):246–53. doi: 10.1093/jamiaopen/ooz007 (PMC6904105; doi:10.1093/jamiaopen/ooz007), 2019-03-28
Supplement: NIHMS1040437-supplement-S_Table_1.pdf [file NIHMS1040437-supplement-S_Table_1.pdf]

Supplementary Table 1. Expanded terms for dietary supplements obtained through word embedding models. NF: not found. NA: not available

| Dietary supplements | Word2vec          |                              |                                                                                    |                                                            |                   |                        | GloVe                  |             |              |                                                      |                   |                         |
|---------------------|-------------------|------------------------------|------------------------------------------------------------------------------------|------------------------------------------------------------|-------------------|------------------------|------------------------|-------------|--------------|------------------------------------------------------|-------------------|-------------------------|
|                     | Semantic variants | Brand names                  | Misspellings                                                                       | Top 5 words in the returned list                           | Average precision | Mean Average Precision | Semantic variants      | Brand names | Misspellings | Top 5 words in the returned list                     | Average precision | Means average precision |
| Calcium             | NF                | Citracal<br>Calcarb<br>Oysco | Calicum<br>Calium<br>Calcum<br>Calcim<br>Calcuim<br>Calicium<br>Calciu<br>Calclium | Magnesium<br>Phosphorus<br>Calicum<br>Calium<br>Calcum     | 0.337             | 0.263                  | NF                     | Caltrate    | NF           | Carbonate<br>Vitamin<br>Magnesium<br>Vit<br>D3       | 0.077             | 0.236                   |
| Chamomile           | Camomile          | NF                           | Camomille                                                                          | Lavender<br>Lavender<br>Licorice<br>Remedy<br>frankincense | 0.063             |                        | Matricaria<br>Camomile | NF          | NF           | Lavender<br>Balm<br>Lemon<br>Dandelion<br>Eucalyptus | 0.082             |                         |
| Cranberry           | Cran              | Ellura                       | Craberry                                                                           | Prune<br>Fibre<br>Pomegranate<br>Noni<br>Cranapple         | 0.124             |                        | NF                     | NF          | NF           | Grape<br>Juice<br>Azo<br>Probiotic<br>Pyridium       | NA                |                         |
| Dandelion           | Taraxacum*        | NF                           | Dandilion                                                                          | maca<br>burdock<br>astragalus<br>tragacanth<br>officinalis | 0.067             |                        | Taraxacum              | NF          | NF           | Cascara<br>Beet<br>Nettle<br>Alfalfa<br>Taraxacum    | 0.200             |                         |
| Flaxseed            | Flax<br>Linseed   | NF                           | NF                                                                                 | Flax<br>Krill<br>Fish<br>Oregano<br>Borage                 | 0.577             |                        | Flax<br>Linseed        | NF          | NF           | Linseed<br>Flax<br>Omega<br>Coenzyme<br>Oil          | 1.000             |                         |
| Garlic              | NF                | Garlique*                    | NF                                                                                 | Cinnamon<br>Turmeric<br>Ginseng<br>Lecithin<br>Oregano     | NA                |                        | NF                     | Garlique    | NF           | Cinnamon<br>Turmeric<br>Oil<br>Ginkgo<br>Primrose    | 0.167             |                         |
| Ginger              | NF                | NF                           | NF                                                                                 | Ale<br>Gingerale<br>Lime                                   | NA                |                        | Zingiber               | NF          | NF           | Ale<br>Tea<br>Glause                                 | 0.090             |                         |

|             |                     |         |                                                                      |                                                                    |       |  |  |  |                                                               |       |
|-------------|---------------------|---------|----------------------------------------------------------------------|--------------------------------------------------------------------|-------|--|--|--|---------------------------------------------------------------|-------|
|             |                     |         |                                                                      | Licorice<br>Tea                                                    |       |  |  |  | Lemon<br>juice                                                |       |
| Ginkgo      | Ginkgo<br>Ginko     | Ginkoba | NF                                                                   | Ginko<br>Ginko<br>Ginkoba<br>Ginseng<br>Bilberry                   | 1.00  |  |  |  | Biloba<br>Ginkoba<br>Ginseng<br>Ginkgo<br>Cohosh              | 0.400 |
| Ginseng     | Ashwagandha         | NF      | Ginseng*                                                             | Resveratrol<br>Astragalus<br>Turmeric<br>Curcumin<br>Echinacea     | 0.077 |  |  |  | Ginkgo<br>Cohosh<br>Primrose<br>Garlic<br>Siberian            | 0.167 |
| Glucosamine | NF                  | NF      | Glucosamin<br>Glucosomine<br>Glucosmaine<br>Clucosamine<br>Glucosame | MSM,<br>Glucos,<br>Complx,<br>Methylsulfonylmethane<br>Chondroitin | 0.138 |  |  |  | Chondroitin<br>Chondroit<br>Omega<br>Ascorbic<br>Chondr       | NA    |
| Lavender    | NF                  | NF      | Lavendar                                                             | Lavender<br>Aromatherapy<br>Diffuser<br>Peppermint<br>Coconut      | 0.553 |  |  |  | Aromatherapy<br>Peppermint,<br>Chamomile,<br>Oils<br>Aroma    | 0.121 |
| Melatonin   | NF                  | NF      | Melatonin                                                            | Lunesta<br>Ambien<br>Temazepam<br>Ramelteon<br>Doxepin             | NA    |  |  |  | Trazodone<br>Hydroxyzine<br>Lorazepam<br>Clonazepam<br>Ambien | NA    |
| Turmeric    | Curcumin<br>Curcuma | NF      | Tumeric                                                              | Curcumin<br>Resveratrol<br>Cinnamon<br>Tumeric<br>Astragalus       | 0.536 |  |  |  | Curcumin<br>Turmeric<br>Curcuma<br>Longa<br>Glucosamine       | 1.000 |
| Valerian    | NF                  | NF      | Valarian<br>Volarian                                                 | Maca<br>Dandelion<br>Ashwagandha<br>Valarian<br>Ginseng            | 0.175 |  |  |  | Wort<br>Kava<br>Tryptophan<br>Cohosh<br>Theanie               | NA    |

Note: \* indicates the term was found from the term list returned by word embedding models on another dietary supplement.
