# Supplementary material for: Using word embeddings to expand terminology of dietary supplements on clinical notes
Source: PubMed Central journal article supplement — JAMIA Open. 2019 Mar 28;2(2):246–53. doi: 10.1093/jamiaopen/ooz007 (PMC6904105; doi:10.1093/jamiaopen/ooz007), 2019-03-28
Supplement: NIHMS1040437-supplement-S_Table_2.pdf [file NIHMS1040437-supplement-S_Table_2.pdf]

Supplementary Table 2. The expanded dietary supplement terms generated using word2vec and GloVe and adapted from two dietary supplement knowledge bases: Dietary Supplement Labeling Database, and Natural Medicine Comprehensive Database.

| Dietary supplements   | Expanded terms                  | Type             |            |             | Source   |       |       |      |
|-----------------------|---------------------------------|------------------|------------|-------------|----------|-------|-------|------|
|                       |                                 | Semantic variant | Brand name | Misspelling | Word2vec | GloVe | DSLDD | NMCD |
| Calcium               | Citracal                        |                  | ✓          |             | ✓        |       |       |      |
|                       | Calcarb                         |                  | ✓          |             | ✓        |       |       |      |
|                       | Oysco                           |                  | ✓          |             | ✓        |       |       |      |
|                       | Caltrate                        |                  | ✓          |             |          | ✓     |       |      |
|                       | Calicum                         |                  |            | ✓           | ✓        |       |       |      |
|                       | Calium                          |                  |            | ✓           | ✓        |       |       |      |
|                       | Calcum                          |                  |            | ✓           | ✓        |       |       |      |
|                       | Calcim                          |                  |            | ✓           | ✓        |       |       |      |
|                       | Calcuim                         |                  |            | ✓           | ✓        |       |       |      |
|                       | Calicium                        |                  |            | ✓           | ✓        |       |       |      |
|                       | Calciu                          |                  |            | ✓           | ✓        |       |       |      |
|                       | Bone Meal                       | ✓                |            |             |          |       | ✓     | ✓    |
|                       | Calcarea Carbonica              | ✓                |            |             |          |       | ✓     | ✓    |
|                       | Calcarea Phosphorica            | ✓                |            |             |          |       | ✓     | ✓    |
|                       | Calcio                          | ✓                |            |             |          |       | ✓     | ✓    |
|                       | Dolomite                        | ✓                |            |             |          |       |       | ✓    |
|                       | Hydroxyapatite                  | ✓                |            |             |          |       | ✓     | ✓    |
|                       | Microcrystalline Hydroxyapatite | ✓                |            |             |          |       | ✓     | ✓    |
|                       | Ossein Hydroxyapatite           | ✓                |            |             |          |       |       | ✓    |
|                       | Stimucal Hydroxyapatite         | ✓                |            |             |          |       | ✓     |      |
|                       | Oyster Shell                    | ✓                |            |             |          |       |       | ✓    |
|                       | Phosphate Tricalcium            | ✓                |            |             |          |       |       | ✓    |
|                       | Tricalcium Phosphate            | ✓                |            |             |          |       | ✓     | ✓    |
|                       | Aquamin                         |                  | ✓          |             |          |       | ✓     |      |
|                       | TRAACS                          |                  | ✓          |             |          |       | ✓     |      |
|                       | DimaCal                         |                  | ✓          |             |          |       | ✓     |      |
|                       | Chamomile                       | Camomile         | ✓          |             |          | ✓     | ✓     | ✓    |
| Camomille             |                                 |                  |            | ✓           | ✓        |       |       |      |
| Matricaria            |                                 | ✓                |            |             |          | ✓     |       |      |
| Matricaria recutita   |                                 | ✓                |            |             |          |       | ✓     | ✓    |
| Chamomilla recutita   |                                 | ✓                |            |             |          |       |       | ✓    |
| Matricaria chamomilla |                                 | ✓                |            |             |          |       | ✓     | ✓    |
| Manzanilla            |                                 | ✓                |            |             |          |       |       | ✓    |
| Chamomilla            | ✓                               |                  |            |             |          | ✓     |       |      |
| Cranberry             | Cran                            | ✓                |            |             | ✓        |       |       |      |
|                       | Ellura                          |                  | ✓          |             | ✓        |       |       |      |
|                       | Craberry                        |                  |            | ✓           | ✓        |       |       |      |
|                       | Vaccinium Macrocarpon           | ✓                |            |             |          |       | ✓     | ✓    |
|                       | Oxycoccus macrocarpos           | ✓                |            |             |          |       |       | ✓    |
|                       | Vaccinium oxycoccus             | ✓                |            |             |          |       |       | ✓    |
|                       | Oxycoccus microcarpus           | ✓                |            |             |          |       |       | ✓    |
| Oxycoccus palustris   | ✓                               |                  |            |             |          |       | ✓     |      |

|           |                       |    |   |   |   |   |   |   |
|-----------|-----------------------|----|---|---|---|---|---|---|
|           | Vaccinium microcarpum | ✓  |   |   |   |   | ✓ | ✓ |
|           | Vaccinium palustre    | ✓  |   |   |   |   |   | ✓ |
|           | Bearberry             | ✓  |   |   |   |   |   | ✓ |
|           | Grosse Moosbeere      | ✓  |   |   |   |   |   | ✓ |
|           | Moosbeere             | ✓  |   |   |   |   |   | ✓ |
|           | Mossberry             | ✓  |   |   |   |   |   | ✓ |
|           | CranRich              |    | ✓ |   |   |   | ✓ |   |
|           | ShanStar              |    | ✓ |   |   |   | ✓ |   |
|           | Cran-Max              |    | ✓ |   |   |   | ✓ |   |
|           | Pacran                |    | ✓ |   |   |   | ✓ |   |
|           | Cranrx                |    | ✓ |   |   |   | ✓ |   |
|           | NutriCran             |    | ✓ |   |   |   | ✓ |   |
| Dandelion | Taraxacum Officinale  | ✓  |   |   |   |   | ✓ | ✓ |
|           | Taraxacum             | ✓  |   |   | ✓ | ✓ |   |   |
|           | dandilion             |    |   | ✓ | ✓ |   |   |   |
|           | Taraxacum Vulgare     | ✓  |   |   |   |   |   | ✓ |
|           | Leontodon Taraxacum   | ✓  |   |   |   |   |   | ✓ |
|           | Taraxacum Dens-leonis | ✓  |   |   |   |   |   | ✓ |
|           | Taraxacum Officinate  | ✓  |   |   |   |   | ✓ |   |
|           | Taraxacum Mongolicum  | ✓  |   |   |   |   | ✓ |   |
|           | Blowball              | ✓  |   |   |   |   |   | ✓ |
|           | Cankerwort            | ✓  |   |   |   |   |   | ✓ |
|           | Cochet                | ✓  |   |   |   |   |   | ✓ |
|           | Pugongying            | ✓  |   |   |   |   | ✓ | ✓ |
|           | Swine Snout           | ✓  |   |   |   |   |   | ✓ |
|           | Wild Endive           | ✓  |   |   |   |   |   | ✓ |
|           | Taraxol               | ✓  |   |   |   |   | ✓ |   |
|           | Taraxasterol          | ✓  |   |   |   |   | ✓ |   |
| Flaxseed  | Flax                  | ✓  |   |   | ✓ | ✓ | ✓ | ✓ |
|           | Linseed               | ✓  |   |   | ✓ | ✓ |   | ✓ |
|           | Linum usitatissimum   |    |   |   |   |   | ✓ | ✓ |
|           | Linum crepitans       |    |   |   |   |   |   | ✓ |
|           | Linum humile          |    |   |   |   |   |   | ✓ |
|           | Linum                 |    |   |   |   |   |   | ✓ |
|           | LinumLife             |    | ✓ |   |   |   | ✓ |   |
|           | MeadowPure            |    | ✓ |   |   |   | ✓ |   |
|           | LignaMax              |    | ✓ |   |   |   | ✓ |   |
|           | ActiFlax              |    | ✓ |   |   |   | ✓ |   |
| Garlic    | Garlique              |    | ✓ |   | ✓ | ✓ |   |   |
|           | Allium sativum        | ✓  |   |   |   |   | ✓ | ✓ |
|           | Allium                | ✓  |   |   |   |   | ✓ | ✓ |
|           | Lasuna                | ✓  |   |   |   |   |   | ✓ |
|           | Rust Treacle          | ✓  |   |   |   |   |   | ✓ |
|           | Allicin               | ✓  |   |   |   |   | ✓ |   |
|           | Allisure              |    | ✓ |   |   |   | ✓ |   |
| Ginger    | Zingiber              | ✓] |   |   |   | ✓ |   |   |
|           | Zingiber officinale   | ✓  |   |   |   |   | ✓ | ✓ |
|           | Amomum zingiber       | ✓  |   |   |   |   |   | ✓ |
|           | Rhizoma Zingiberi     | ✓  |   |   |   |   |   | ✓ |
|           | Sheng Jiang           | ✓  |   |   |   |   |   | ✓ |
|           | Shunthi               | ✓  |   |   |   |   | ✓ | ✓ |

|             |                             |   |   |   |   |   |   |   |
|-------------|-----------------------------|---|---|---|---|---|---|---|
|             | Sunth                       | ✓ |   |   |   |   |   |   |
|             | Sunthi                      | ✓ |   |   |   |   |   |   |
|             | Zingiberis Rhizoma          | ✓ |   |   |   |   | ✓ | ✓ |
|             | Zingiberis Siccatum Rhizoma | ✓ |   |   |   |   |   | ✓ |
|             | Zinzeberis                  | ✓ |   |   |   |   |   | ✓ |
|             | Zinziber Officinale         | ✓ |   |   |   |   |   | ✓ |
|             | Zinziber Officinalis        | ✓ |   |   |   |   | ✓ | ✓ |
|             | Gingerol                    | ✓ |   |   |   |   | ✓ |   |
|             | Zingerone                   | ✓ |   |   |   |   | ✓ |   |
|             | Shaogols                    | ✓ |   |   |   |   | ✓ |   |
|             | Zingiberene                 | ✓ |   |   |   |   | ✓ |   |
| Ginkgo      | Gingko                      | ✓ |   |   | ✓ | ✓ |   |   |
|             | Ginko                       | ✓ |   |   | ✓ | ✓ |   |   |
|             | Ginkoba                     |   | ✓ |   | ✓ | ✓ |   |   |
|             | Terpene Lactones            | ✓ |   |   |   |   | ✓ |   |
|             | Flavone Glycosides          | ✓ |   |   |   |   | ✓ |   |
|             | Maidenhair Tree             | ✓ |   |   |   |   | ✓ | ✓ |
|             | Ginkgetin                   | ✓ |   |   |   |   | ✓ |   |
|             | Fossil Tree                 | ✓ |   |   |   |   |   | ✓ |
|             | Japanese Silver Apricot     | ✓ |   |   |   |   |   | ✓ |
| Ginseng     | Ashwagandha                 | ✓ |   |   | ✓ | ✓ |   |   |
|             | Ginsing                     |   |   | ✓ | ✓ |   |   |   |
|             | Panax Schinseng             | ✓ |   |   |   |   |   | ✓ |
|             | Insam                       | ✓ |   |   |   |   |   | ✓ |
|             | Korean Panax                | ✓ |   |   |   |   |   | ✓ |
|             | Panax Quinquefolius         | ✓ |   |   |   |   | ✓ | ✓ |
|             | Panax Quinquefolia          | ✓ |   |   |   |   |   | ✓ |
|             | Panax Quinquefolium         | ✓ |   |   |   |   | ✓ | ✓ |
|             | Red Berry                   | ✓ |   |   |   |   |   | ✓ |
|             | Eleutherococcus Senticosus  | ✓ |   |   |   |   | ✓ | ✓ |
|             | Acanthopanax Senticosus     | ✓ |   |   |   |   |   | ✓ |
|             | Hedera Senticosa            | ✓ |   |   |   |   |   | ✓ |
|             | Acanthopanax Obovatus       | ✓ |   |   |   |   |   | ✓ |
|             | Eleuthero                   | ✓ |   |   |   |   | ✓ | ✓ |
|             | Eleutherococci Radix        | ✓ |   |   |   |   |   | ✓ |
|             | Eleutherococcus             | ✓ |   |   |   |   | ✓ | ✓ |
|             | Ussuri                      | ✓ |   |   |   |   |   | ✓ |
|             | Wild Pepper                 | ✓ |   |   |   |   |   | ✓ |
|             | CVT-E002                    | ✓ |   |   |   |   | ✓ |   |
|             | White Panax                 | ✓ |   |   |   |   | ✓ |   |
|             | Ginsenosides                | ✓ |   |   |   |   | ✓ |   |
|             | Prince Seng                 | ✓ |   |   |   |   | ✓ |   |
|             | San-Qi                      | ✓ |   |   |   |   | ✓ |   |
| Glucosamine | Glucosamin                  |   |   | ✓ | ✓ |   |   |   |
|             | Glucosomine                 |   |   | ✓ | ✓ |   |   |   |
|             | Glucosmaine                 |   |   | ✓ | ✓ |   |   |   |
|             | Clucosamine                 |   |   | ✓ | ✓ |   |   |   |
|             | Glucosame                   |   |   | ✓ | ✓ |   |   |   |
|             | Amino Monosaccharide        | ✓ |   |   |   |   |   | ✓ |

|           |                              |   |   |   |   |   |   |   |
|-----------|------------------------------|---|---|---|---|---|---|---|
|           | Chitosamine Hydrochloride    | ✓ |   |   |   |   |   | ✓ |
|           | Mono-Sulfated Saccharide     | ✓ |   |   |   |   |   | ✓ |
|           | Sulfated Monosaccharide      | ✓ |   |   |   |   |   | ✓ |
|           | Sulfated Saccharide          | ✓ |   |   |   |   |   | ✓ |
|           | Regensure                    |   | ✓ |   |   |   | ✓ |   |
|           | GreenGrown                   |   | ✓ |   |   |   | ✓ |   |
| Lavender  | Lavendar                     |   |   | ✓ | ✓ | ✓ |   |   |
|           | Lavander                     |   |   | ✓ | ✓ |   |   |   |
|           | Lavandula                    | ✓ |   |   |   | ✓ |   |   |
|           | Lavandula angustifolia       | ✓ |   |   |   |   | ✓ | ✓ |
|           | Lavandula latifolia          | ✓ |   |   |   |   |   | ✓ |
|           | Lavandula pubescens          | ✓ |   |   |   |   |   | ✓ |
|           | Lavandula stoechas           | ✓ |   |   |   |   |   | ✓ |
|           | Silexan                      |   | ✓ |   |   |   | ✓ |   |
| Melatonin | Melatonin                    |   |   |   |   |   |   |   |
|           | N-Acetyl-5-Methoxytryptamine |   |   |   |   |   |   |   |
|           | 5-Methoxy-N-Acetyltryptamine |   |   |   |   |   |   |   |
|           | Pineal Hormone               |   |   |   |   |   |   |   |
| Turmeric  | Curcumin                     | ✓ |   |   |   |   |   | ✓ |
|           | Curcuma                      | ✓ |   |   | ✓ |   | ✓ | ✓ |
|           | Tumeric                      |   |   | ✓ |   |   |   |   |
|           | Curcuma Longa                | ✓ |   |   |   |   |   | ✓ |
|           | Curcumae Longae Rhizoma      | ✓ |   |   |   |   |   | ✓ |
|           | Curcuminoid                  | ✓ |   |   |   |   | ✓ | ✓ |
|           | Indian Saffron               | ✓ |   |   |   |   |   | ✓ |
|           | Radix Curcumae               | ✓ |   |   |   |   |   | ✓ |
|           | Rhizoma Cucurmae Longae      | ✓ |   |   |   |   |   | ✓ |
|           | Safran Bourbon               | ✓ |   |   |   |   |   | ✓ |
|           | Haridra                      | ✓ |   |   |   |   | ✓ | ✓ |
|           | Theracurmin                  | ✓ |   |   |   |   | ✓ |   |
|           | Tetrahydrocurcuminoids       | ✓ |   |   |   |   | ✓ |   |
|           | Haldee Ghana                 | ✓ |   |   |   |   | ✓ |   |
|           | Turmerine                    | ✓ |   |   |   |   |   | ✓ |
|           | Meriva                       |   | ✓ |   |   |   | ✓ |   |
|           | BCM-95                       |   | ✓ |   |   |   | ✓ |   |
|           | Longvida                     |   | ✓ |   |   |   | ✓ |   |
|           | CurcuWin                     |   | ✓ |   |   |   | ✓ |   |
| Valerian  | Valarian                     |   |   | ✓ | ✓ |   |   |   |
|           | Volarian                     |   |   | ✓ | ✓ |   |   |   |
|           | Valeriana Officinalis        | ✓ |   |   |   |   | ✓ | ✓ |
|           | Valeriana Edulis             | ✓ |   |   |   |   |   | ✓ |
|           | Valeriana wallichii          | ✓ |   |   |   |   |   |   |
|           | Valeriana Sitchensis         | ✓ |   |   |   |   |   | ✓ |
|           | Baldrianwurzel               | ✓ |   |   |   |   |   | ✓ |
|           | Garden Heliotrope            | ✓ |   |   |   |   |   | ✓ |
|           | Valeriana Rhizome            | ✓ |   |   |   |   |   | ✓ |
|           | Valerianae Radix             | ✓ |   |   |   |   |   | ✓ |

|  |                      |   |  |  |  |  |   |  |
|--|----------------------|---|--|--|--|--|---|--|
|  | Valeriana Capitata   | ✓ |  |  |  |  | ✓ |  |
|  | Valeriana Officinale | ✓ |  |  |  |  | ✓ |  |
|  | Valerenic Acid       | ✓ |  |  |  |  | ✓ |  |
